# Supplementary material for: Ultrasonic cartilage thickness measurement is accurate, reproducible, and reliable—validation study using contrast-enhanced micro-CT
Source: J Orthop Surg Res. 2019 Feb 27;14:67. doi: 10.1186/s13018-019-1099-8 (PMC6391750; doi:10.1186/s13018-019-1099-8)
Supplement: Supplementary file 1 — The raw data of the current study for the ultrasonic and CT measurements of cartilage thickness were included as an additional file in the file. Data validation ultrasonic cartilage thickness measurement. (XLSX 10 kb) [file 13018_2019_1099_MOESM1_ESM.xlsx]

## Sheet: Sheet1
No	Specimen	Observer 1, US Measurement 1	Observer 1, US Measurement 2	Observer 2, US Measurement 1	Observer 2, US Measurement 2	CT
1	Porcine	1568	1504	1584	1584	1690
2	Porcine	1408	1552	1520	1552	1410
3	Porcine	1248	1120	1104	1088	1100
4	Porcine	1264	1264	1312	1264	1430
5	Porcine	1296	1360	1392	1440	1340
6	Porcine	1456	1440	1504	1472	1530
7	Porcine	1296	1264	1232	1248	1220
8	Porcine	1072	1088	1072	992	897
9	Porcine	832	816	848	848	866
10	Bovine	1376	1264	1392	1328	1300
11	Bovine	2064	2128	2064	2048	1820
12	Bovine	1904	2000	1952	2048	1840
13	Bovine	1776	1760	1824	1792	1790
14	Bovine	587	597	594	600	588
15	Bovine	928	944	1152	992	766
16	Bovine	1392	1376	1344	1344	1450
17	Bovine	1008	992	1024	960	1000
18	Bovine	1536	1616	1616	1616	1710
19	Bovine	2368	2304	2528	2480	2190
20	Bovine	1264	1264	1280	1232	1470
21	Bovine	832	864	864	896	913
22	Porcine	816	736	688	704	772
23	Porcine	1136	1072	1088	1088	1150
24	Porcine	1504	1568	1552	1520	1540
25	Porcine	1200	1152	1168	1136	1240
26	Porcine	1376	1344	1424	1424	1490
27	Porcine	800	800	864	816	877
28	Porcine	1424	1392	1424	1456	1390
29	Porcine	1200	1154	1200	1152	1140
30	Bovine	1296	1344	1328	1264	1350
31	Bovine	1280	1280	1280	1312	1250
32	Bovine	1120	1152	1072	1072	1180
33	Bovine	1232	1232	1168	1168	1220
34	Bovine	1664	1648	1632	1648	1710
35	Bovine	1952	2000	2032	2016	2090
36	Bovine	1456	1472	1392	1424	1530
37	Bovine	1776	1744	1728	1744	1830
38	Bovine	1984	2032	1968	1968	1910
39	Bovine	2440	2408	2504	2504	2460
40	Bovine	816	816	768	800	827
41	Bovine	848	864	832	832	869
42	Bovine	1008	1056	976	1024	1080
43	Bovine	1040	1040	1056	1024	1120
44	Bovine	1616	1616	1552	1568	1670
45	Bovine	1888	1856	1856	1872	1940
46	Bovine	1584	1520	1456	1488	1540
47	Bovine	1408	1408	1440	1456	1460
48	Bovine	1376	1344	1424	1456	1490
49	Bovine	1216	1184	1136	1168	1110
50	Bovine	1648	1696	1664	1536	1610
